# Supplementary material for: Caveolin-1 scaffolding domain peptide abrogates autophagy dysregulation in pulmonary fibrosis
Source: PubMed Central journal article supplement (PMC9246916; doi:10.1038/s41598-022-14832-4), 2022-06-30

Fig 1E

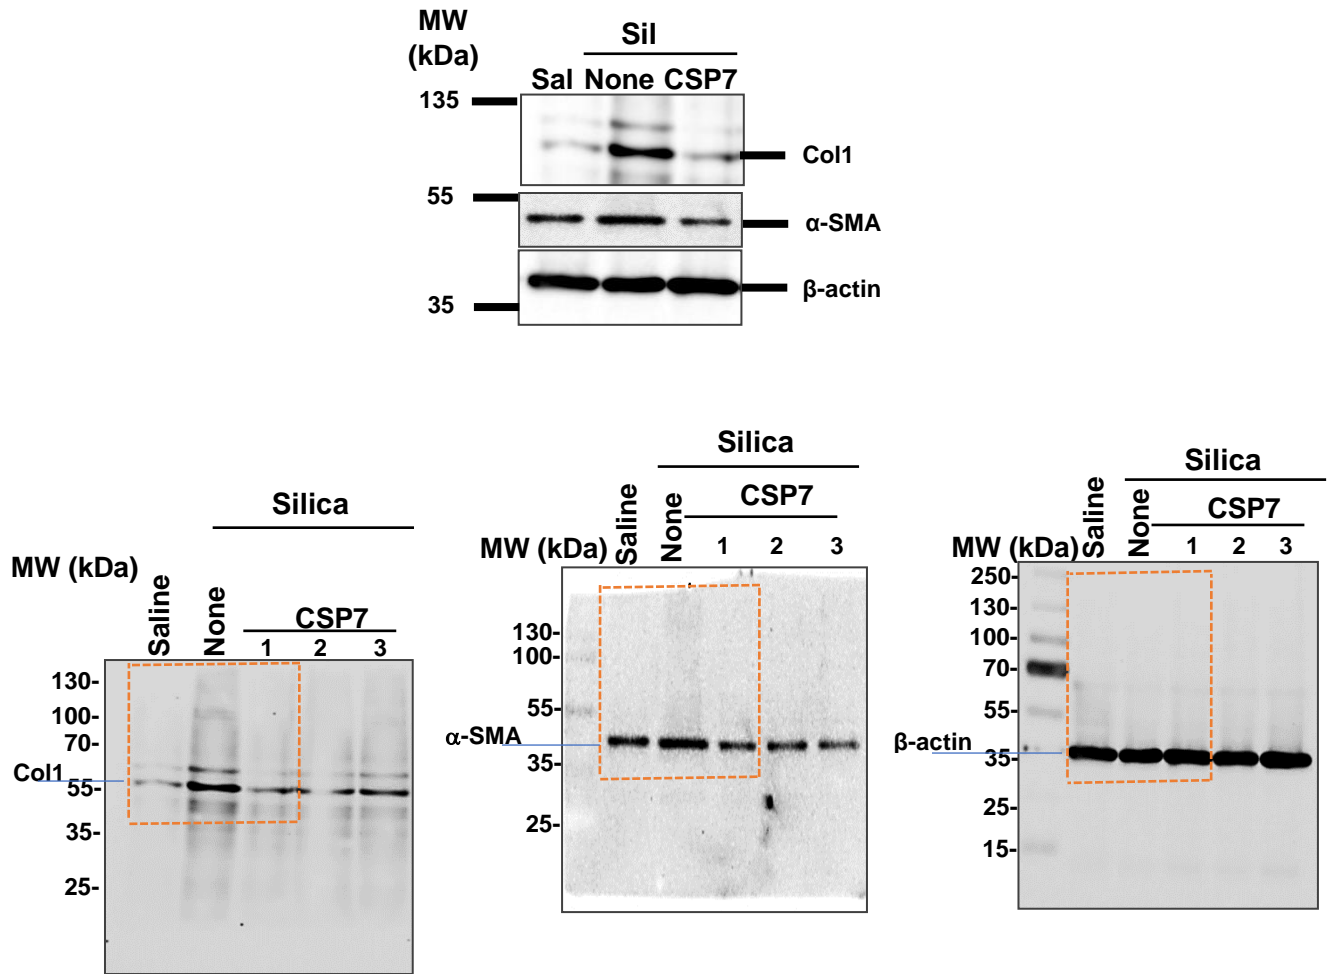

Fig 2A

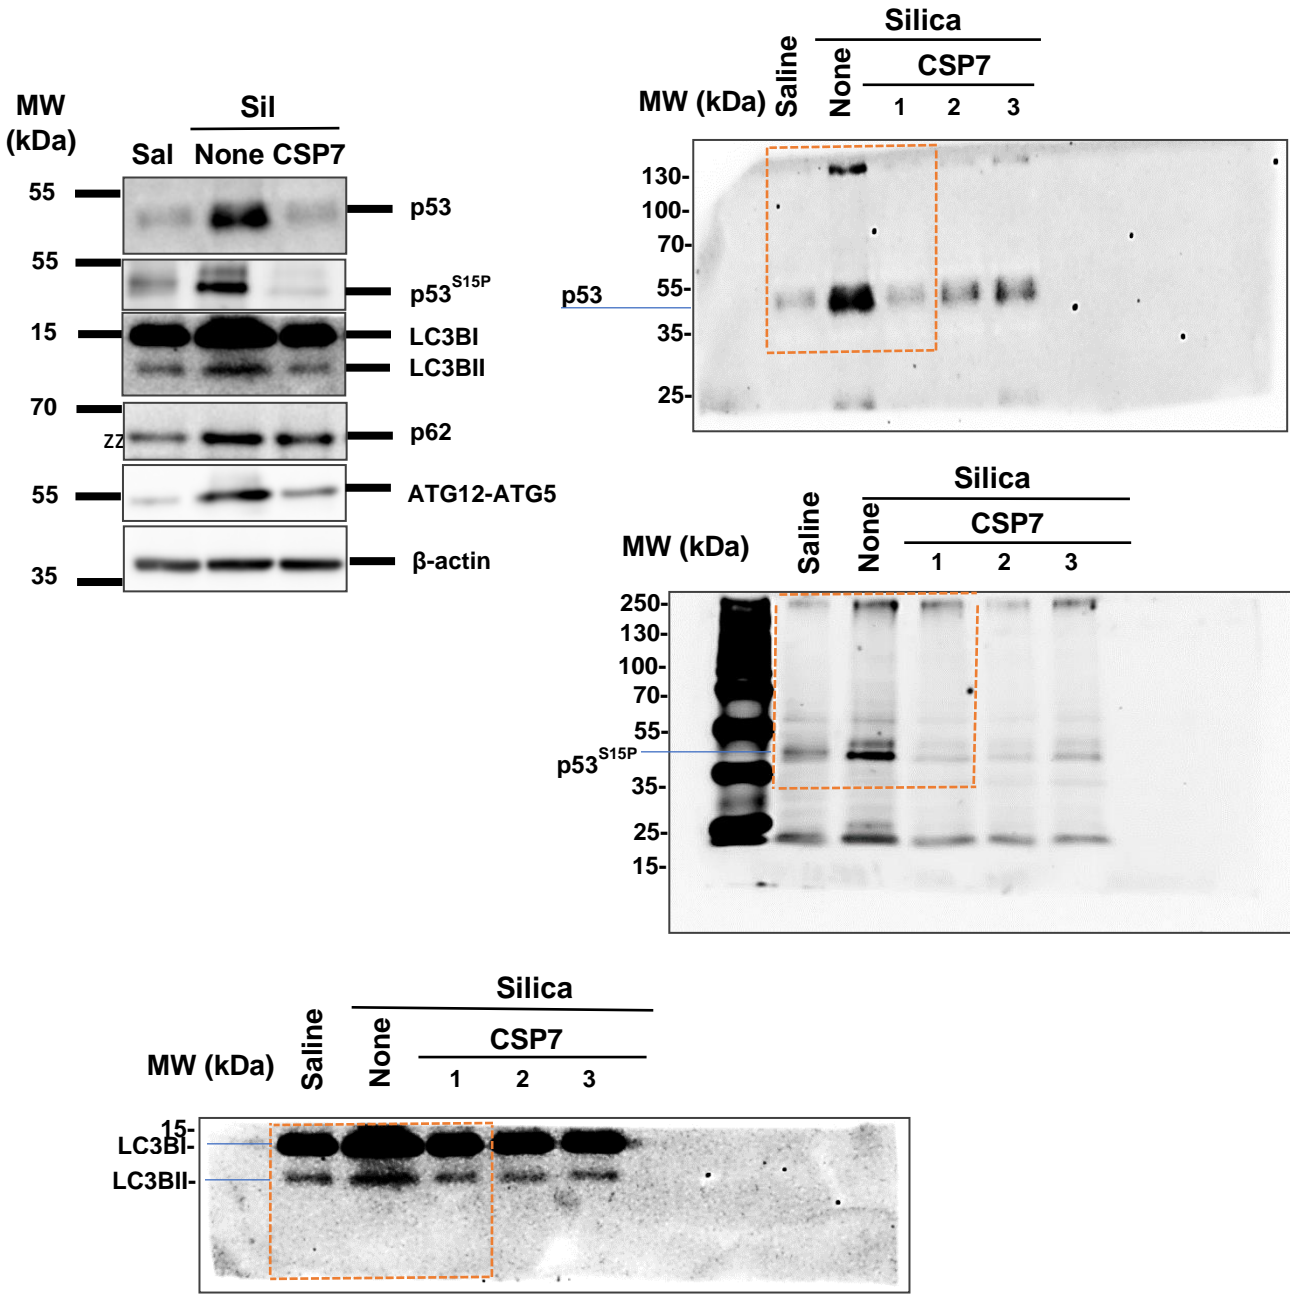

Fig 2A

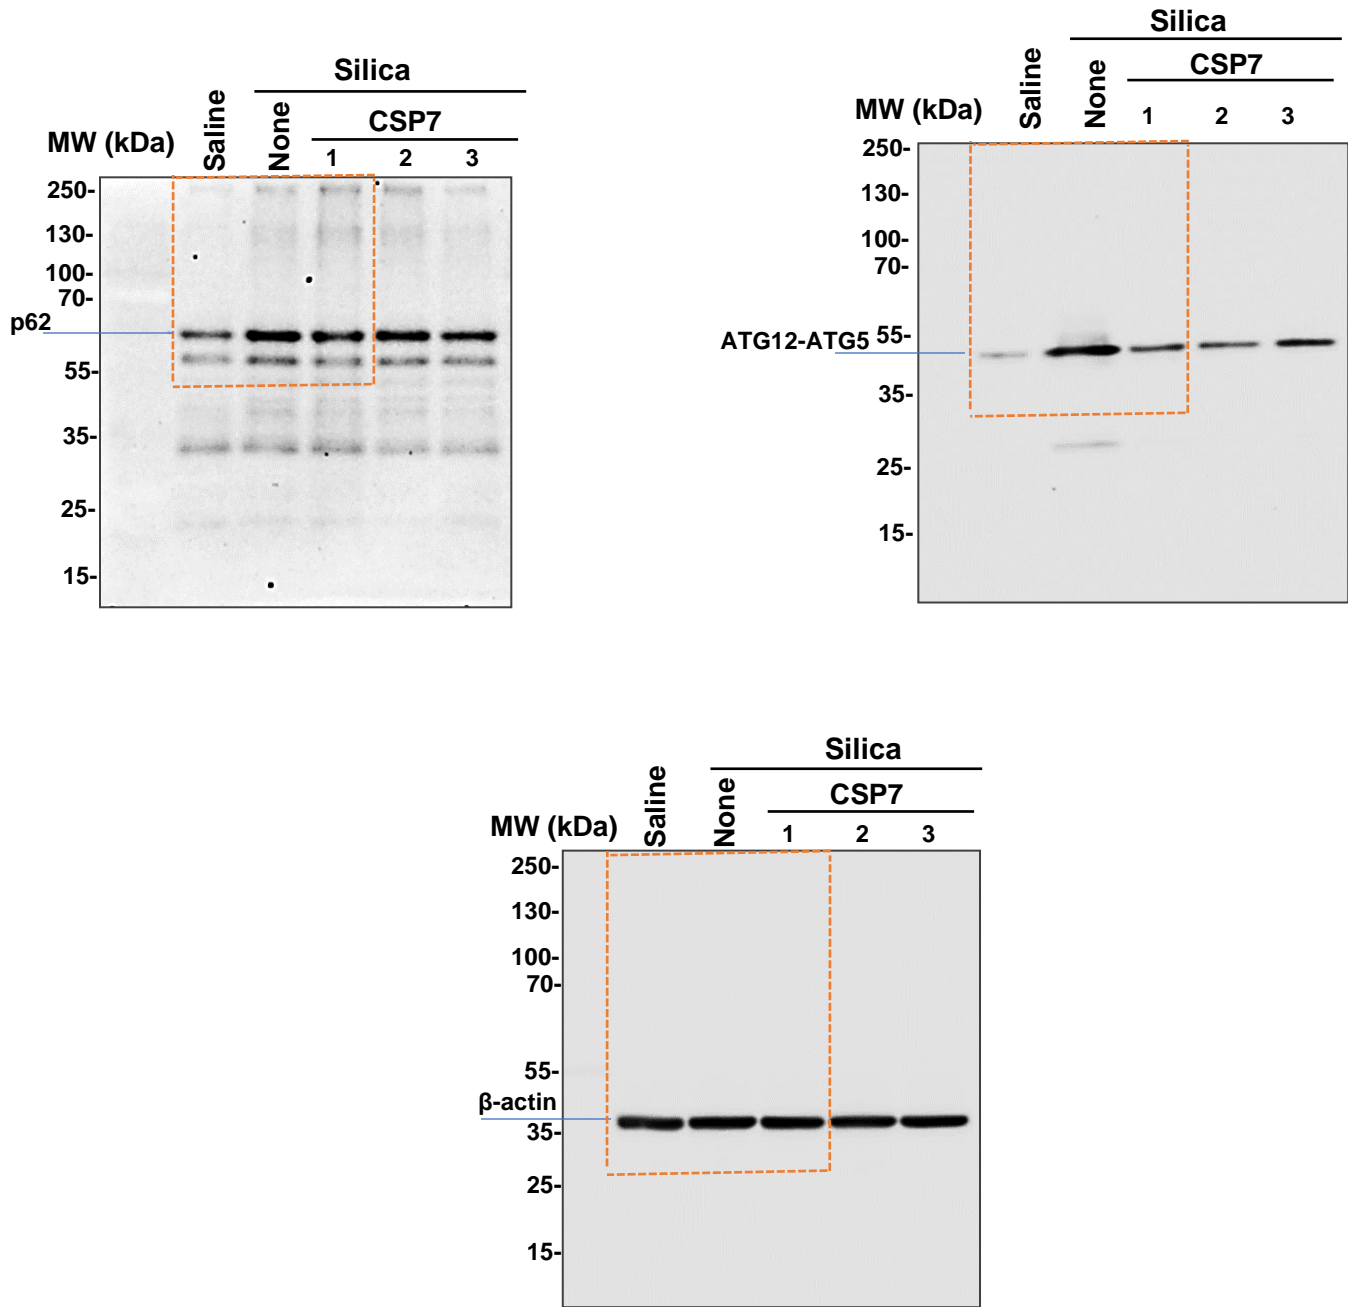

Fig 2E

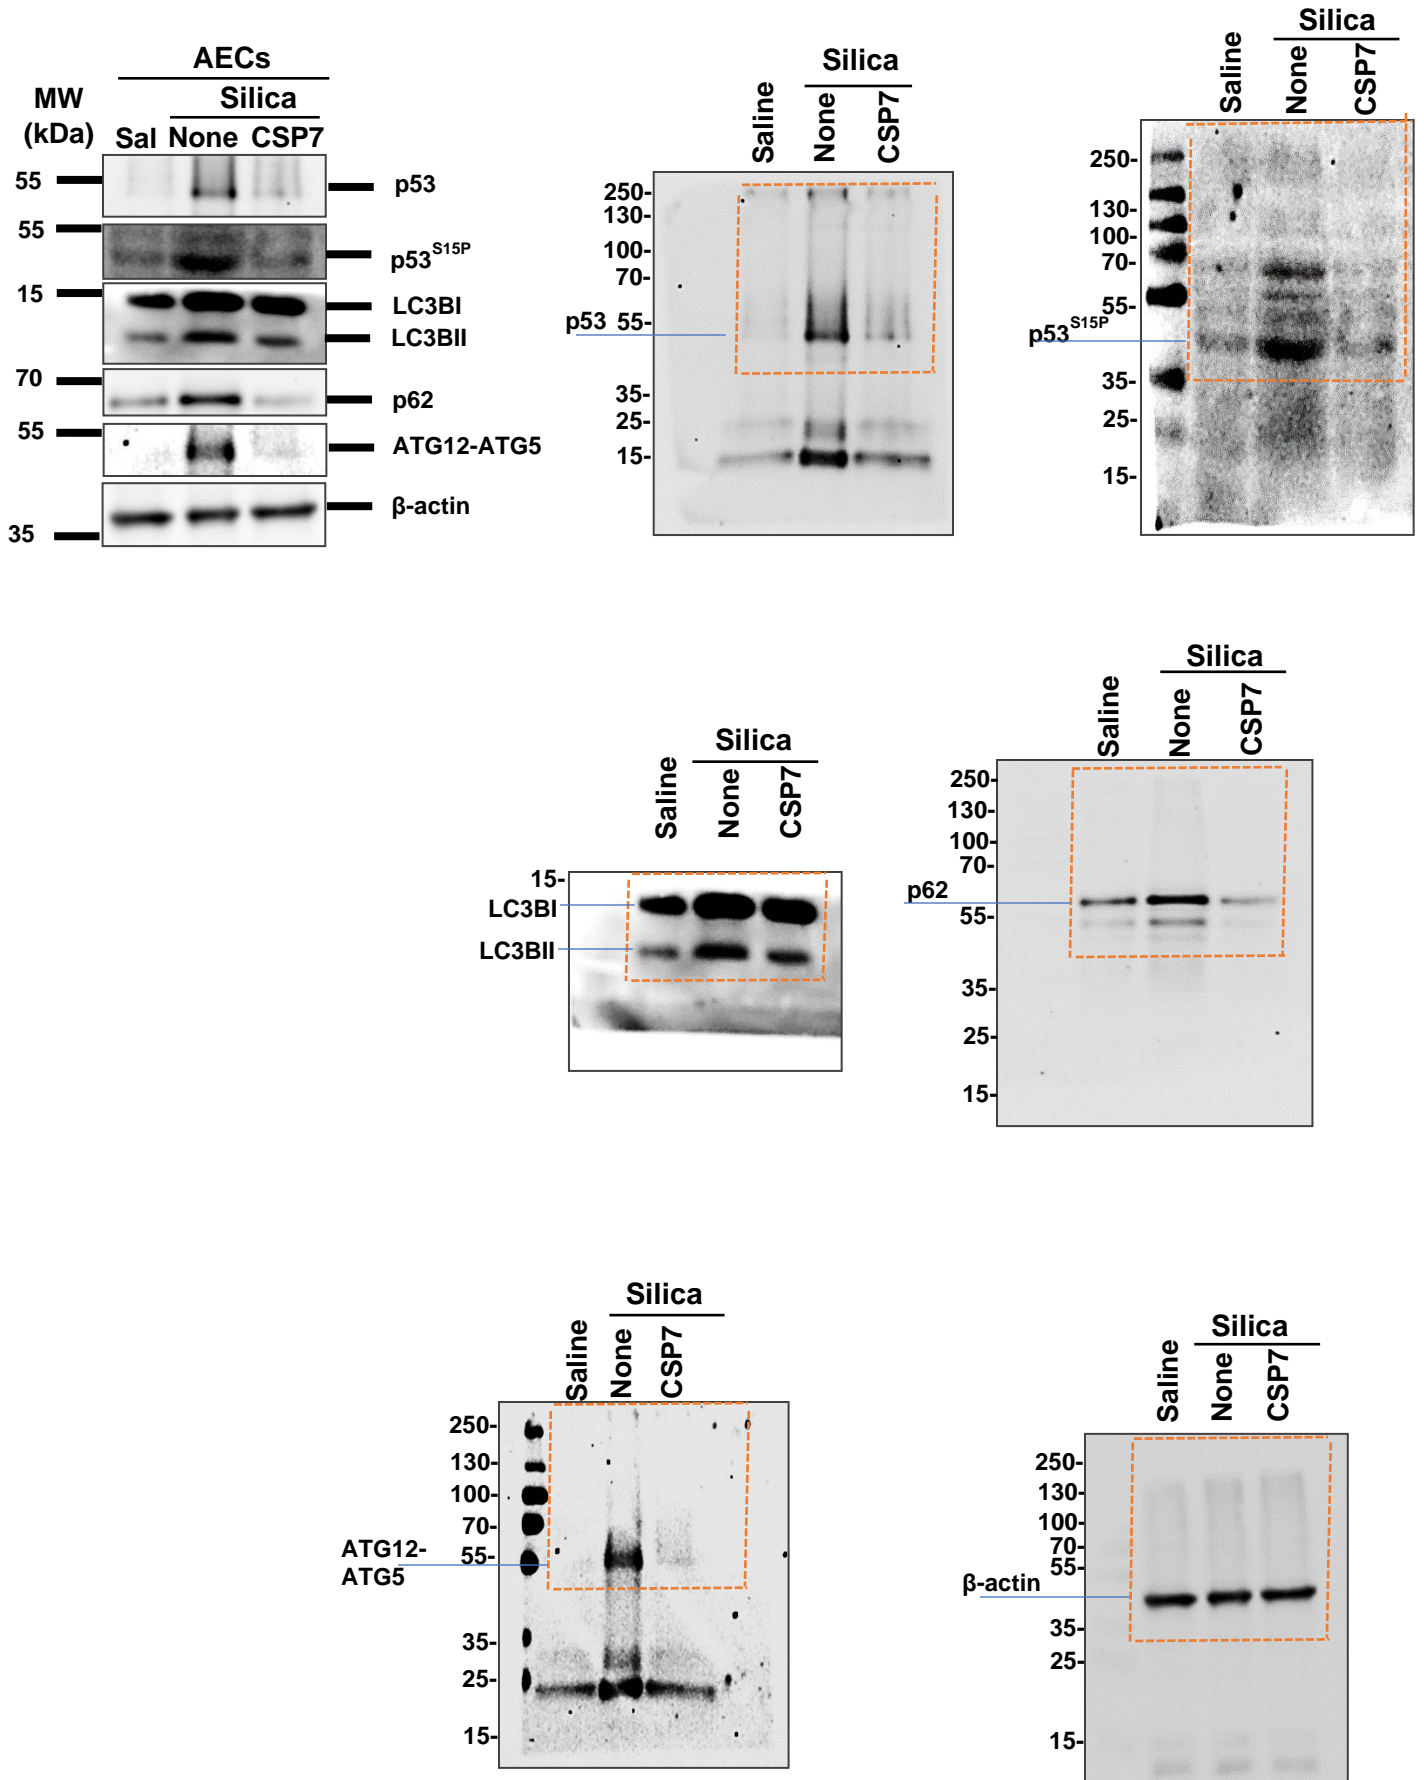

Fig 3A

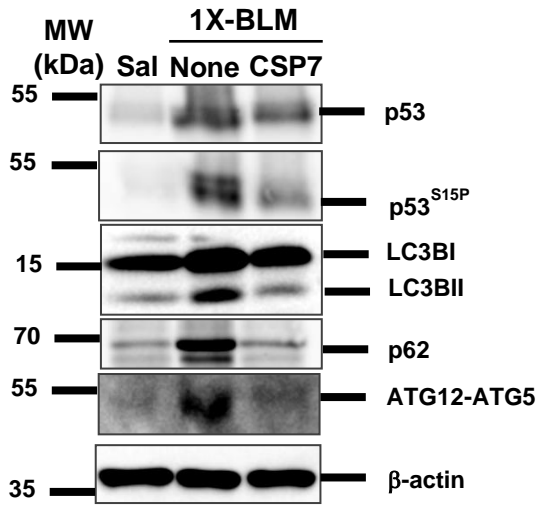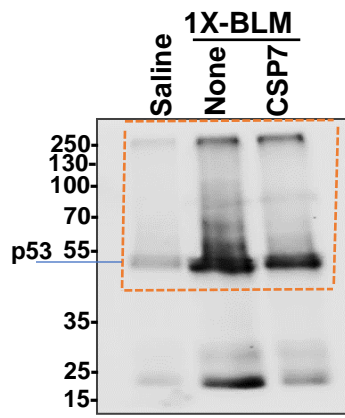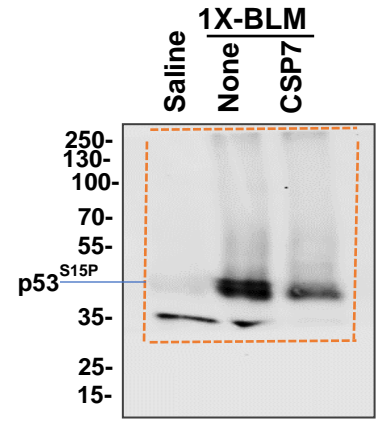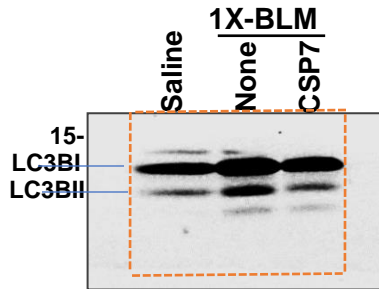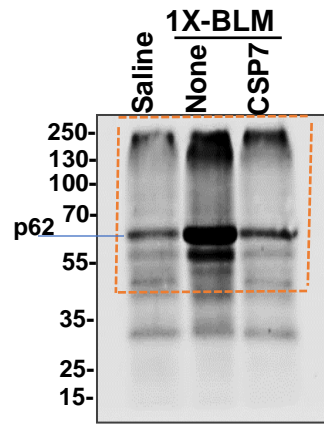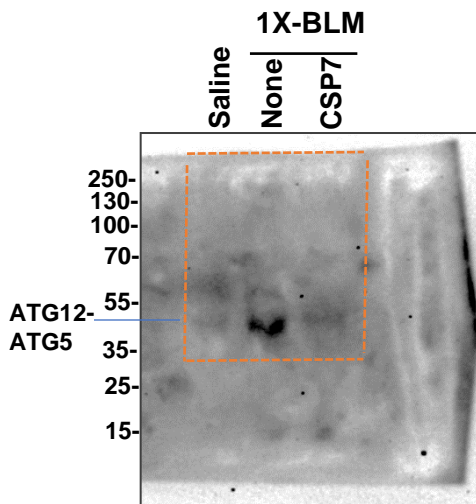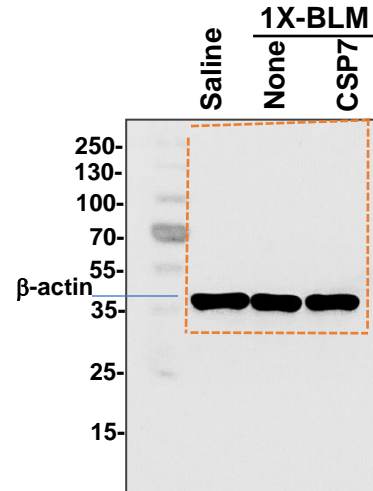

Fig 3E

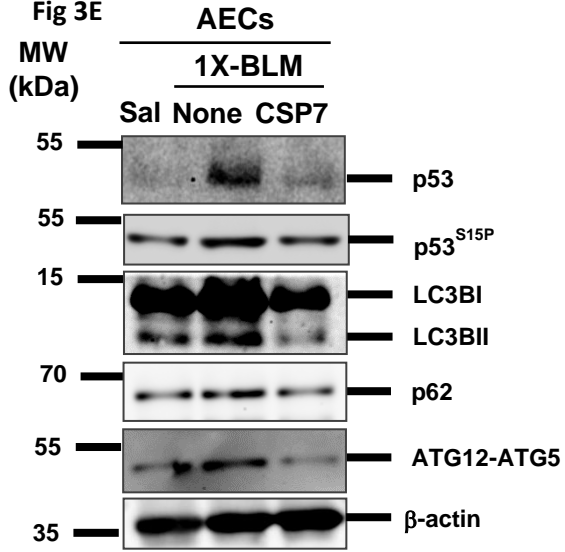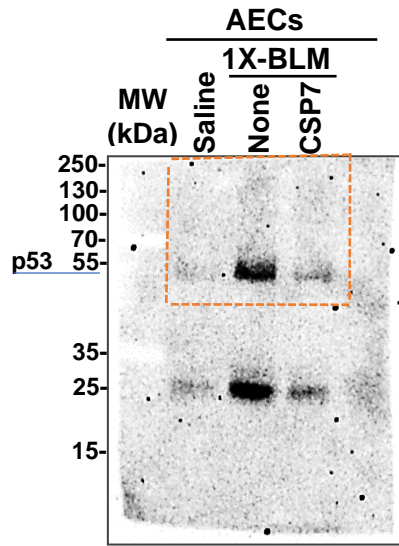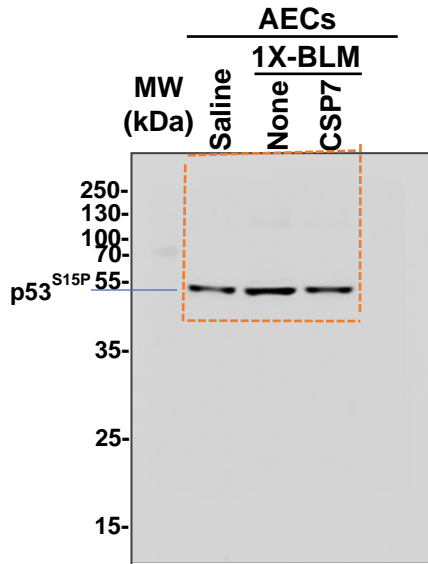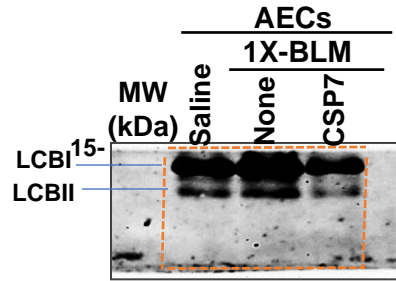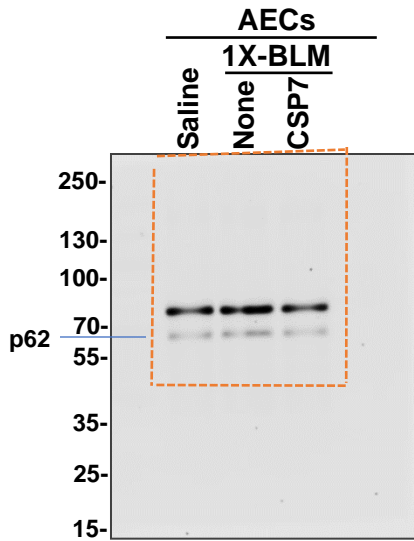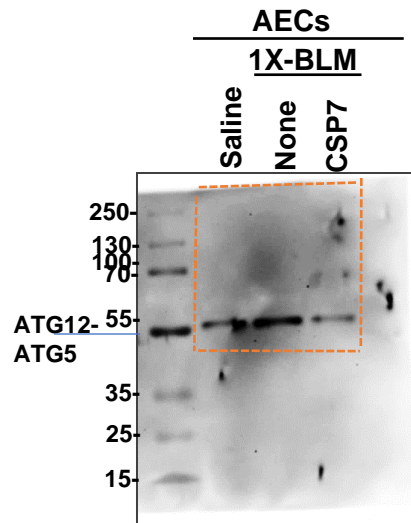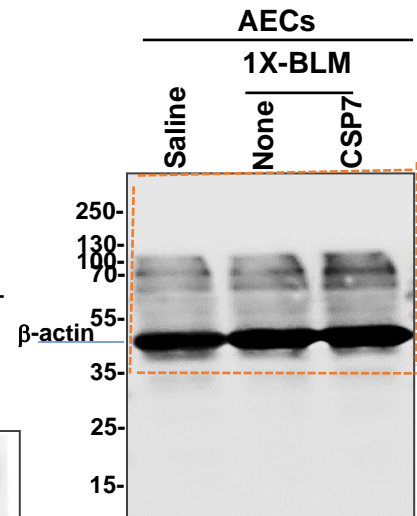

Fig 4A

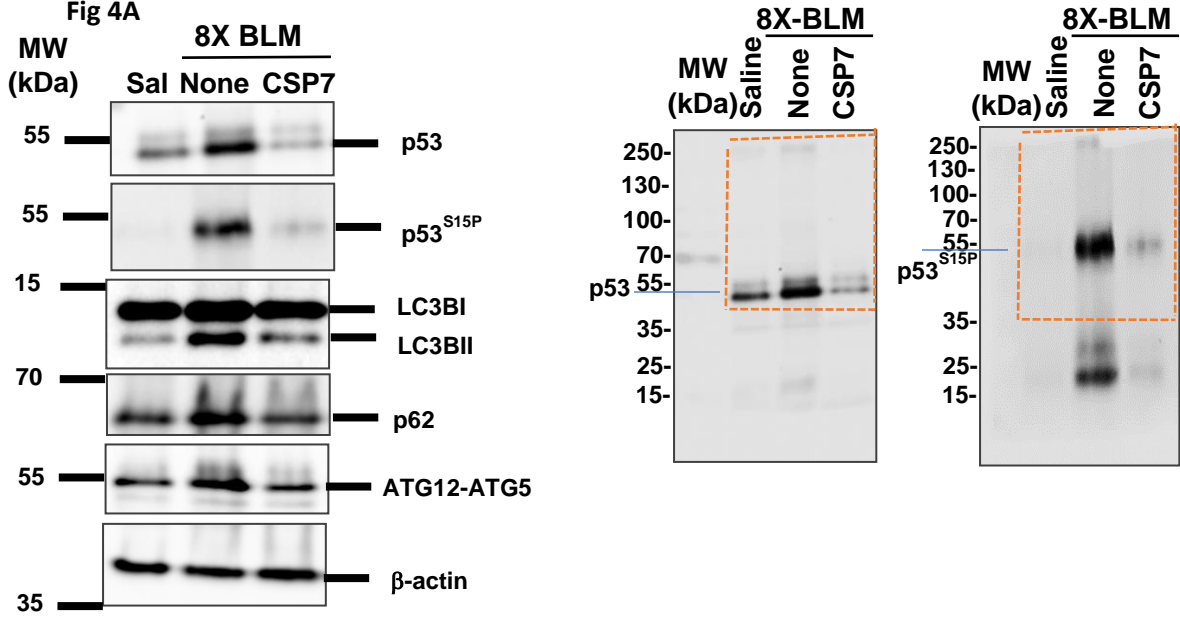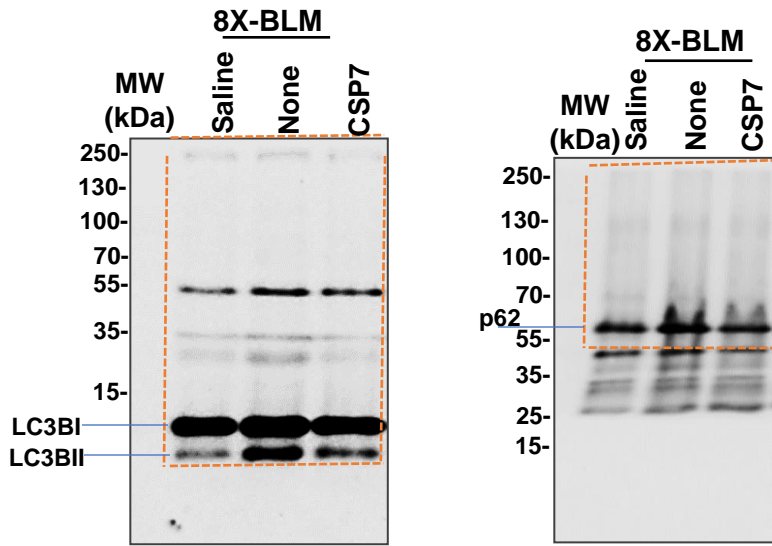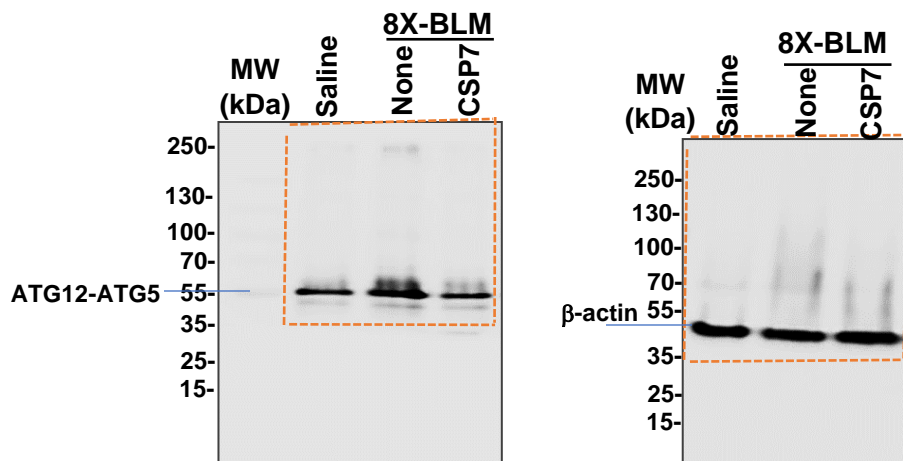

Fig 4E  
MW  
(kDa)

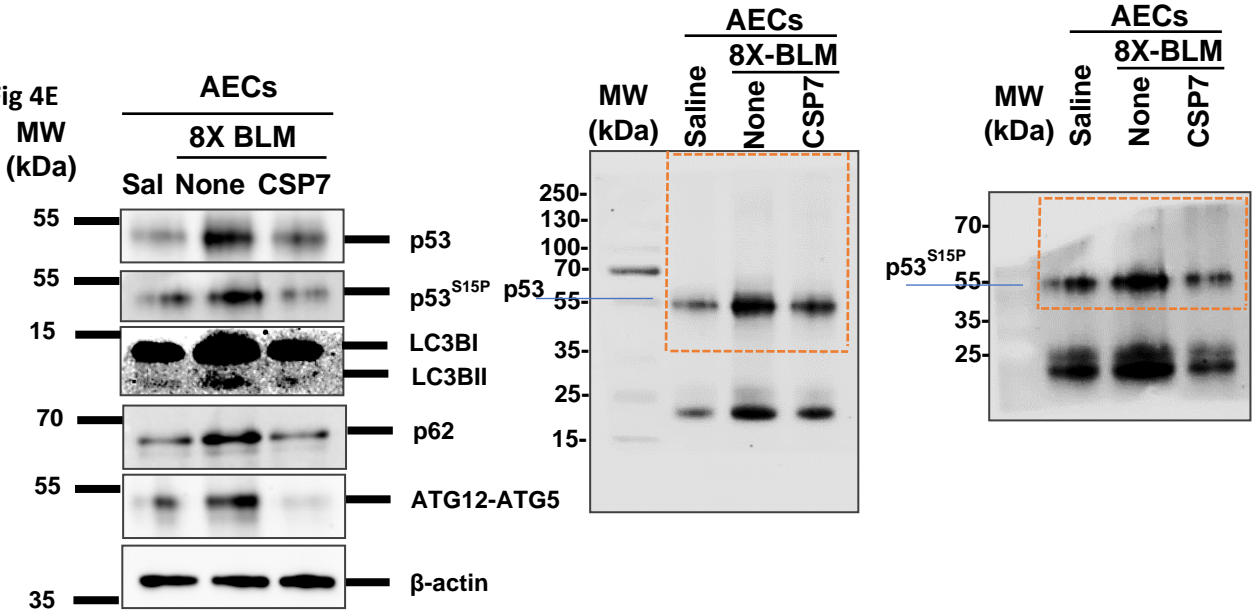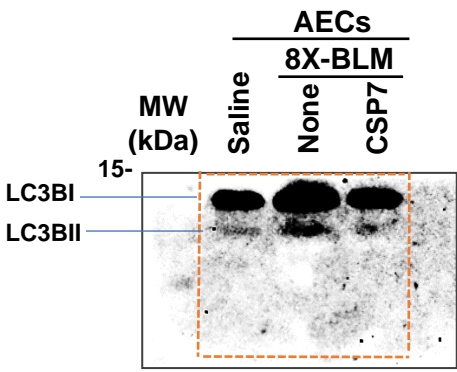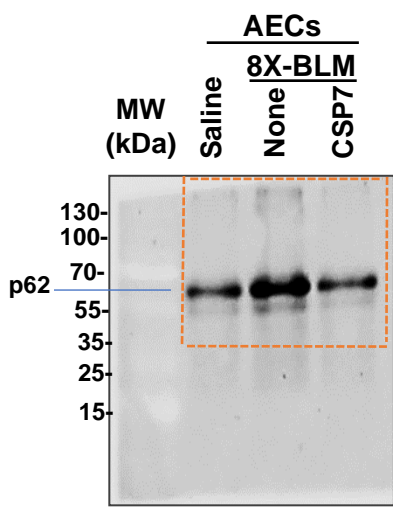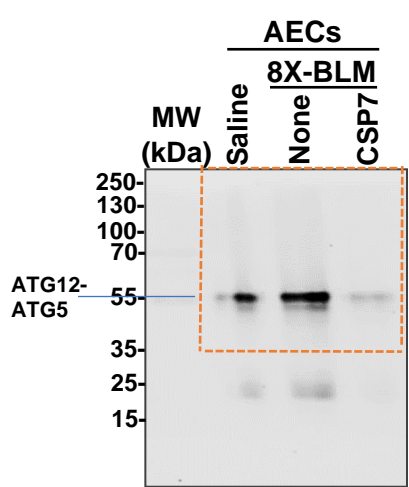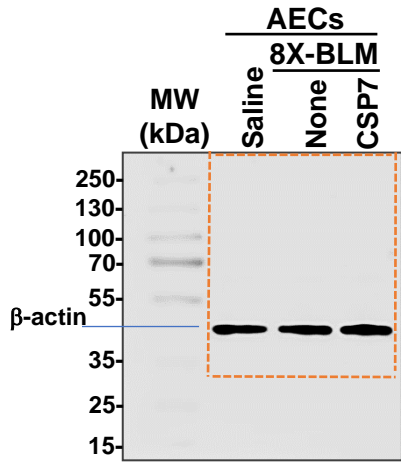



Fig 5A

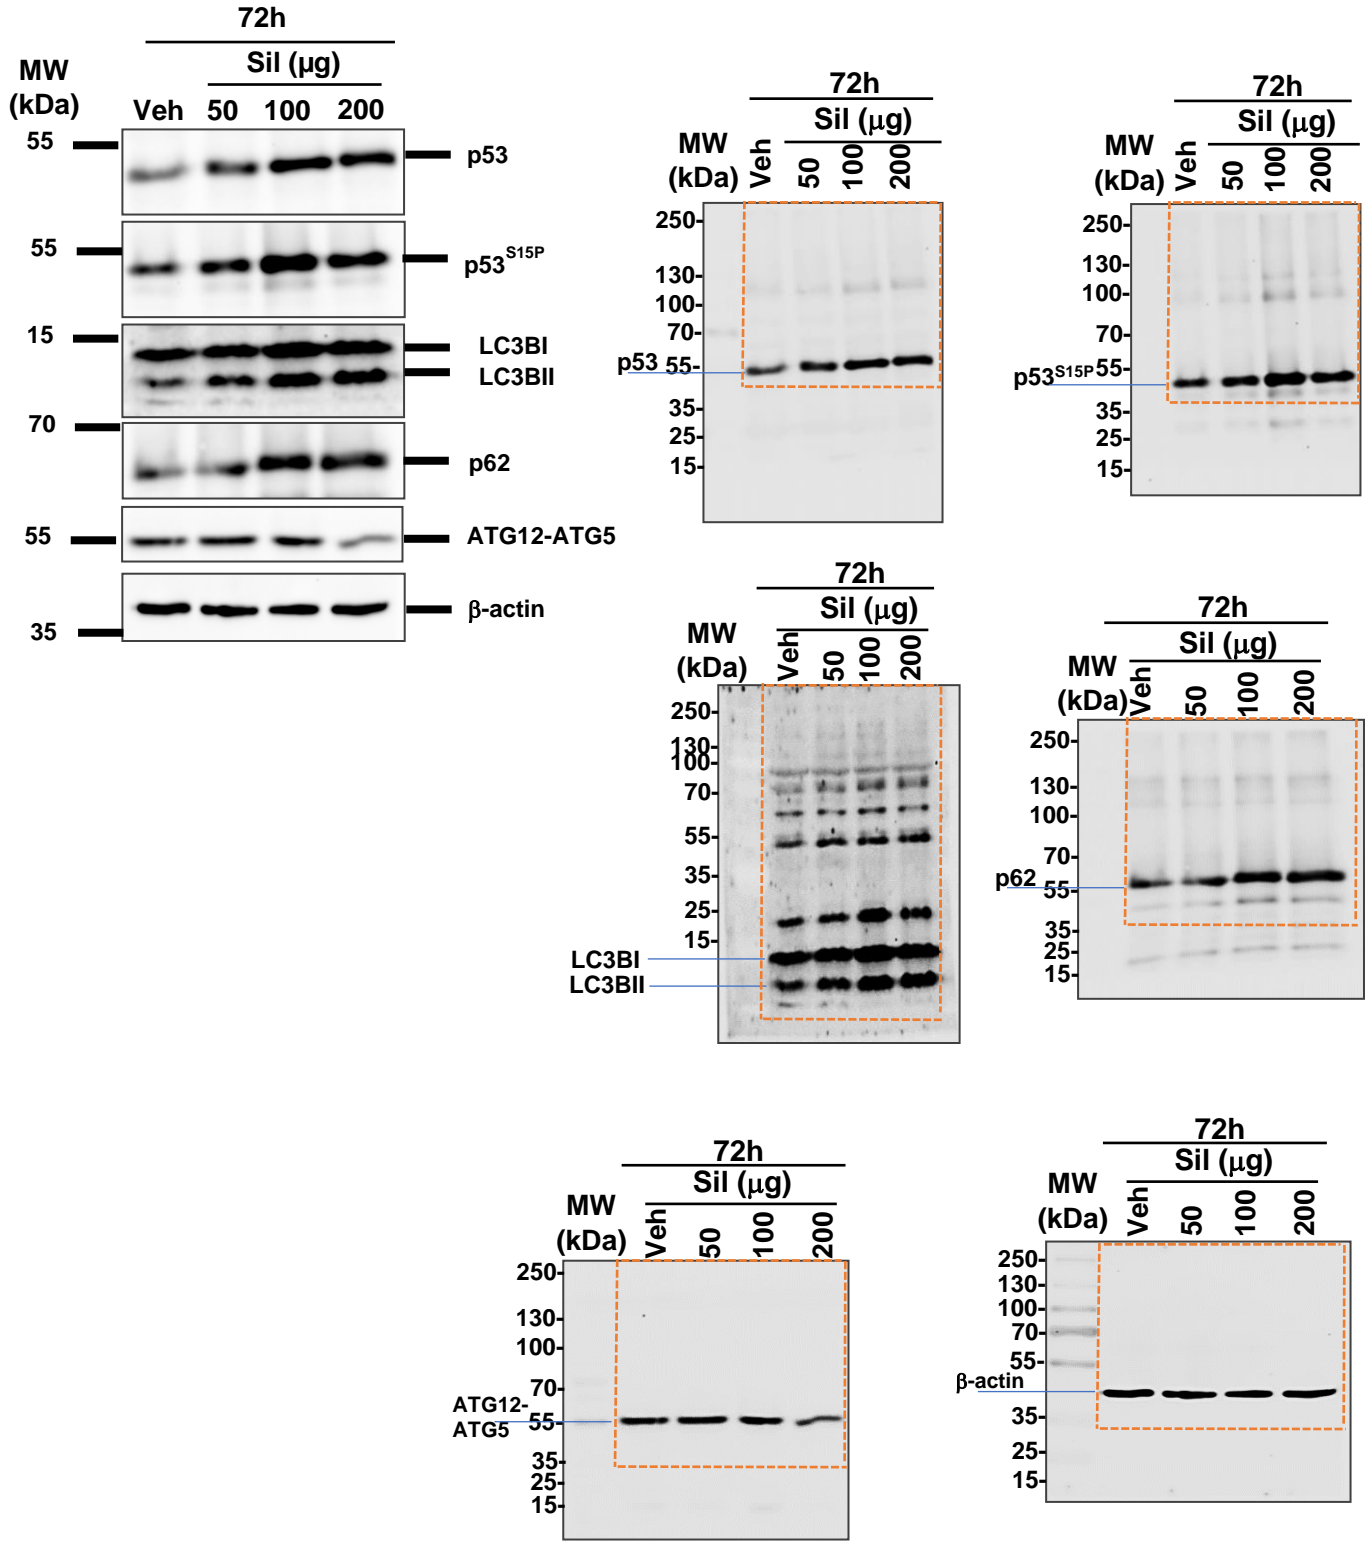

Fig 5B

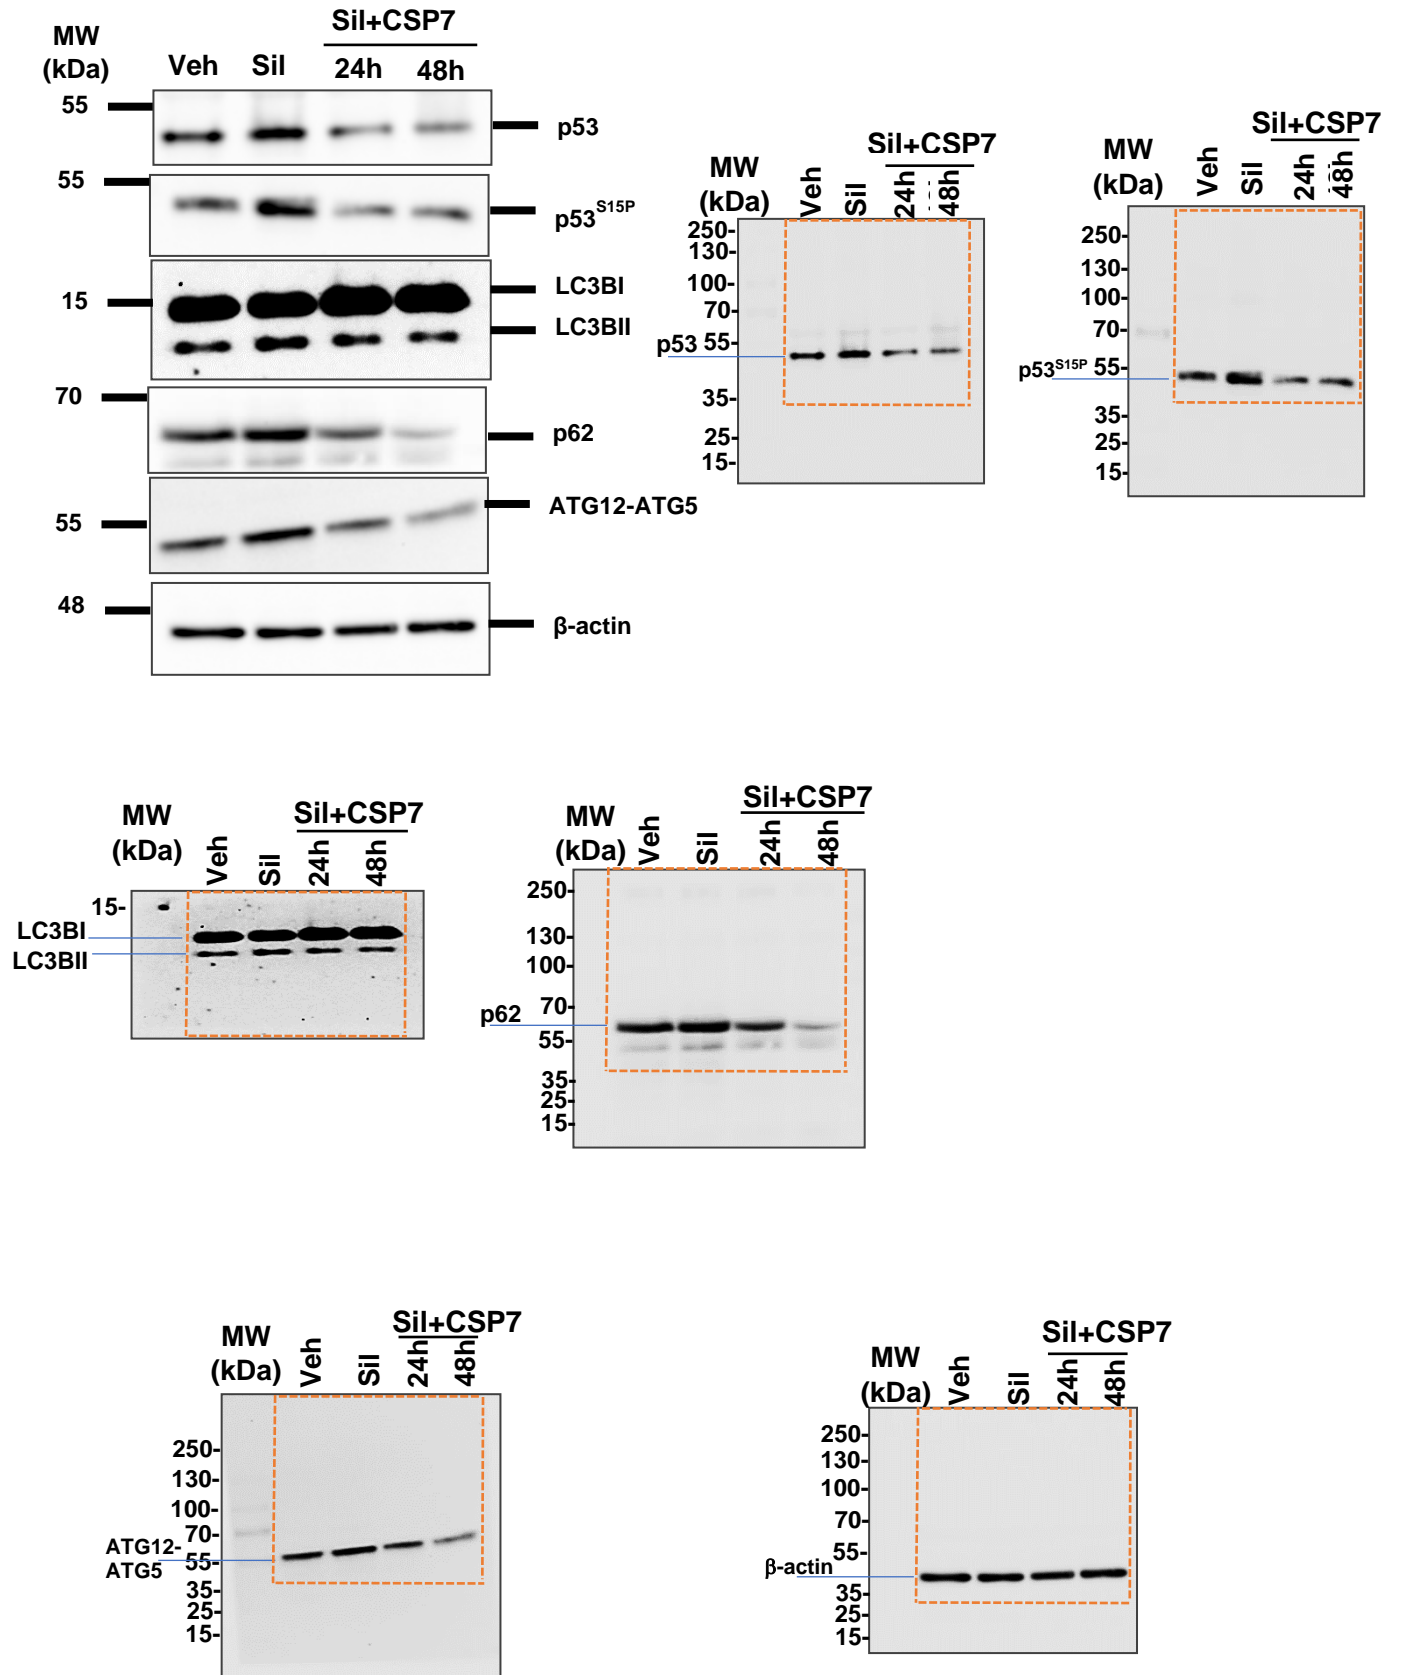

Fig 5C

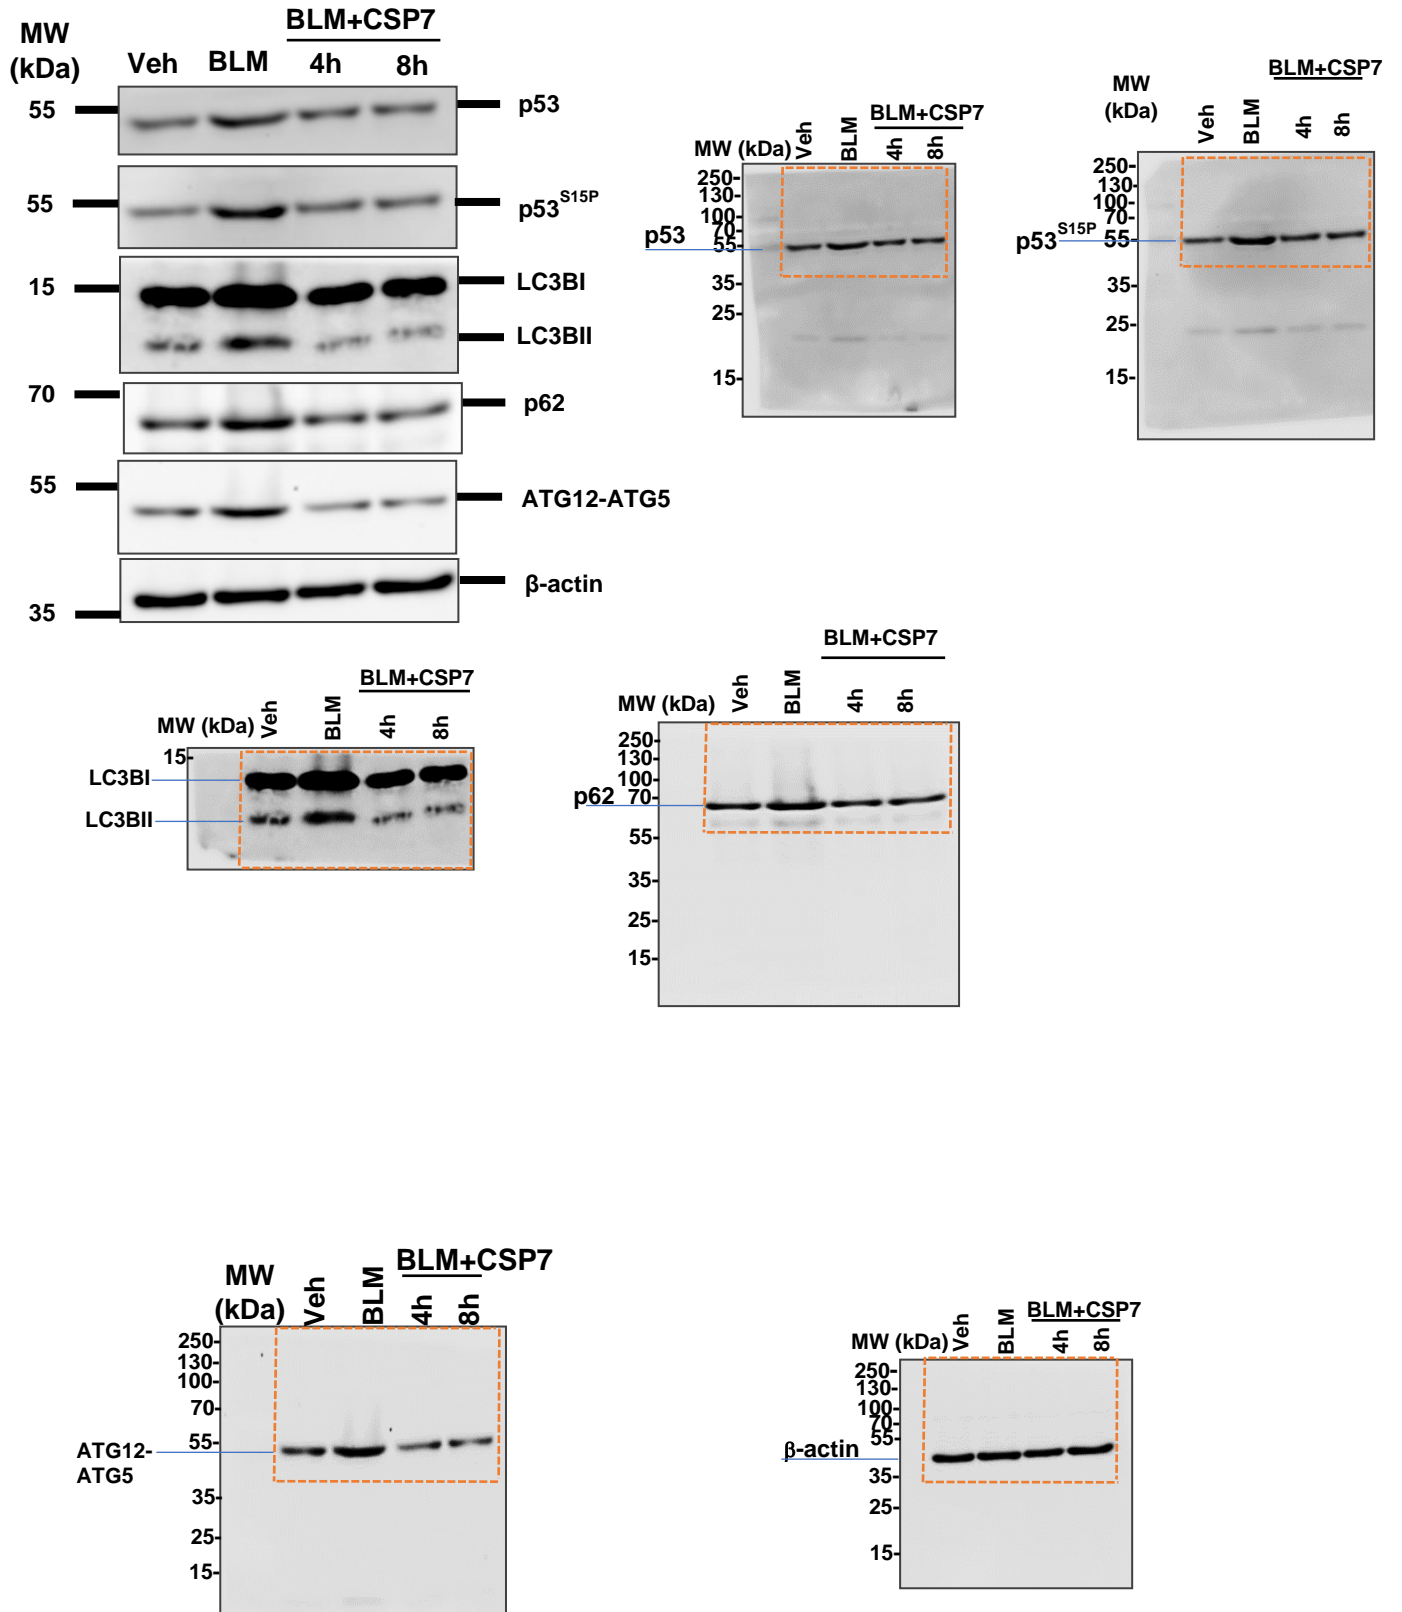

Fig 5D

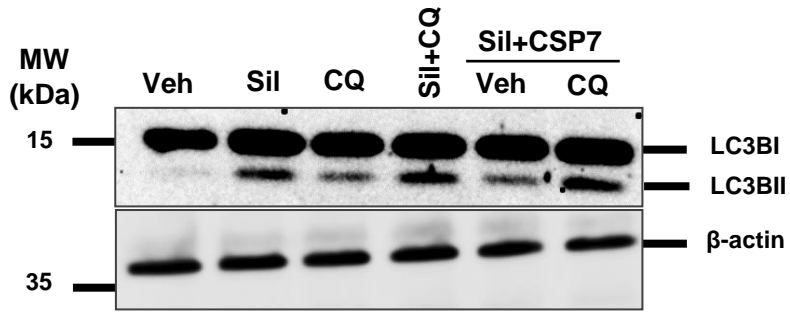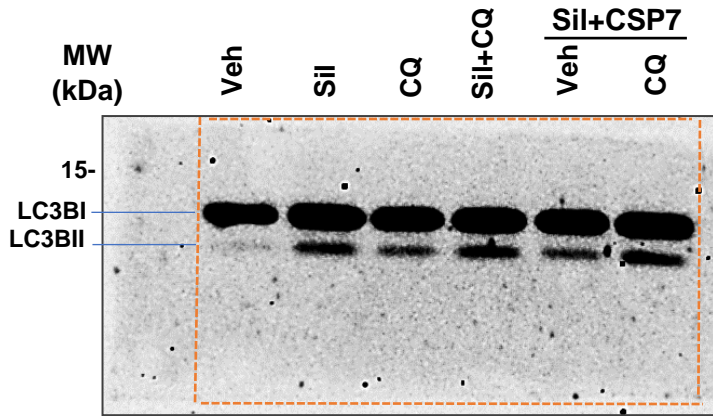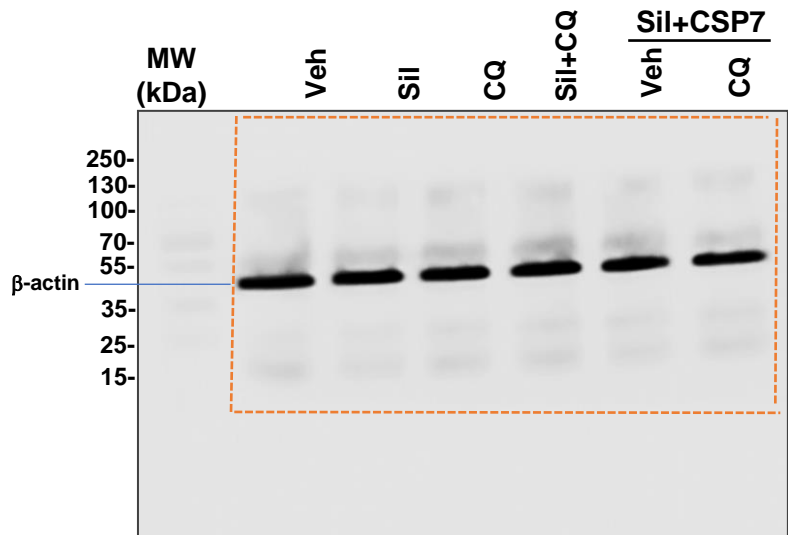

Fig 5E

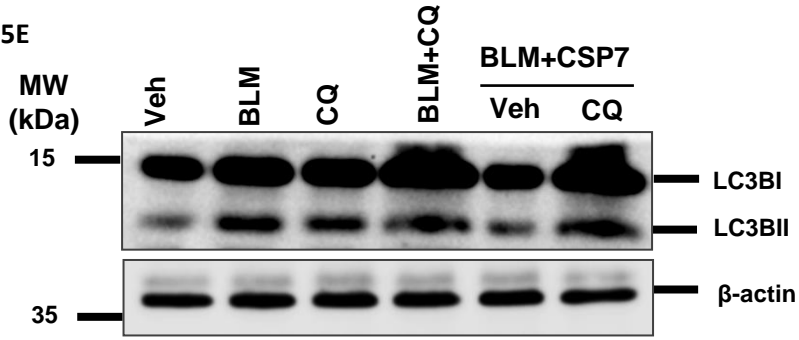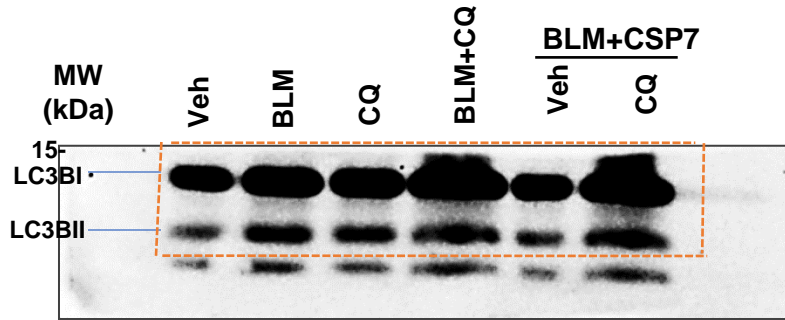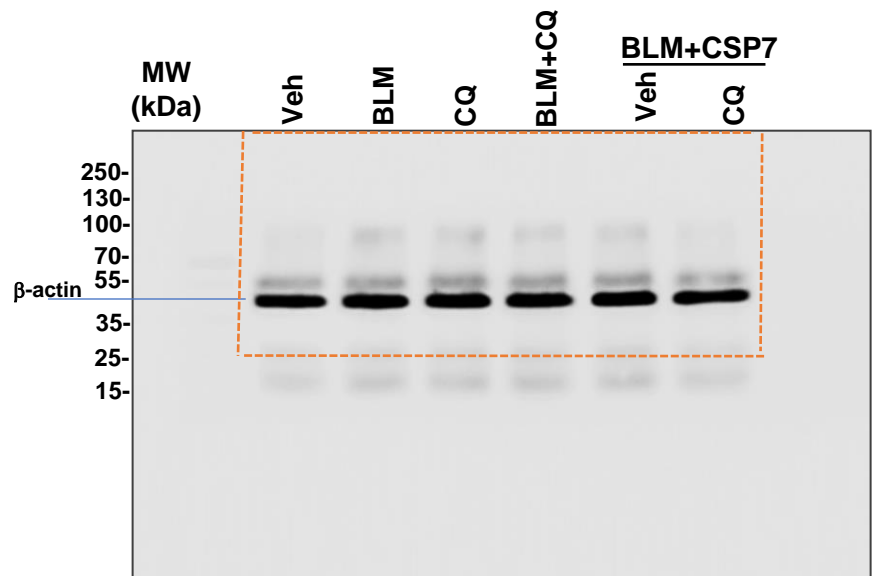

Fig 5F

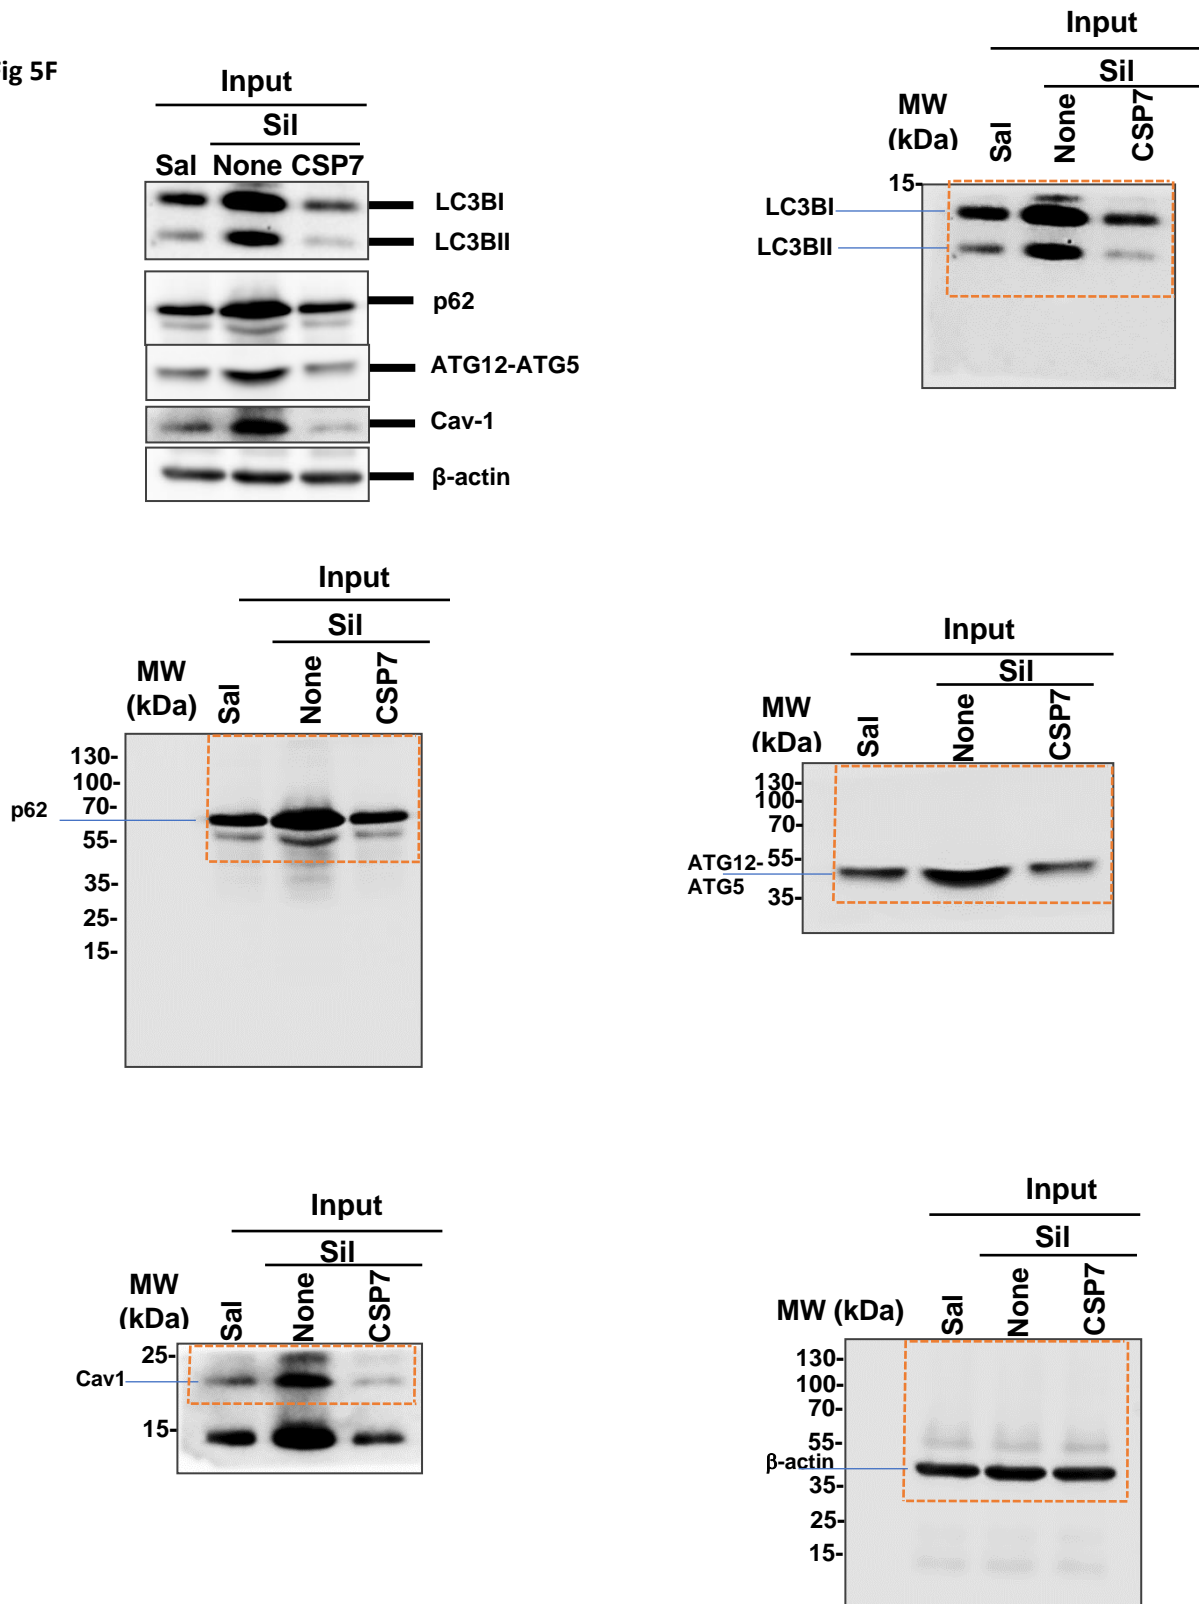

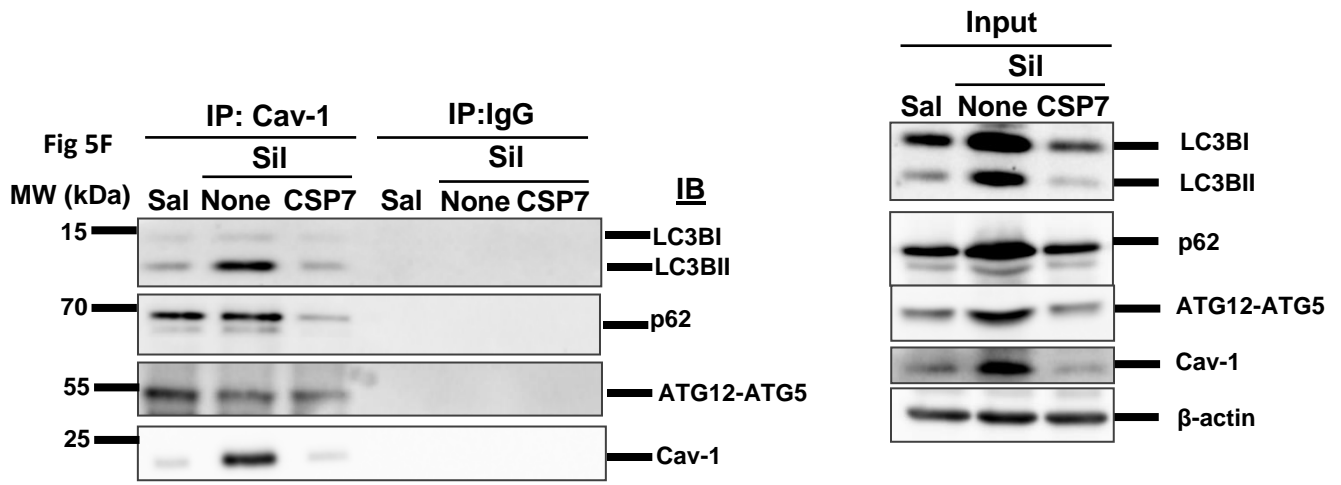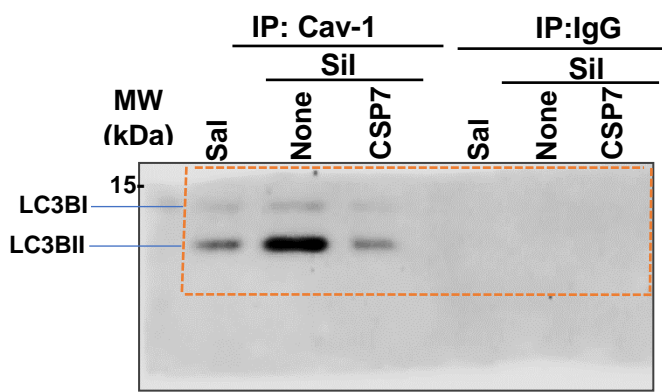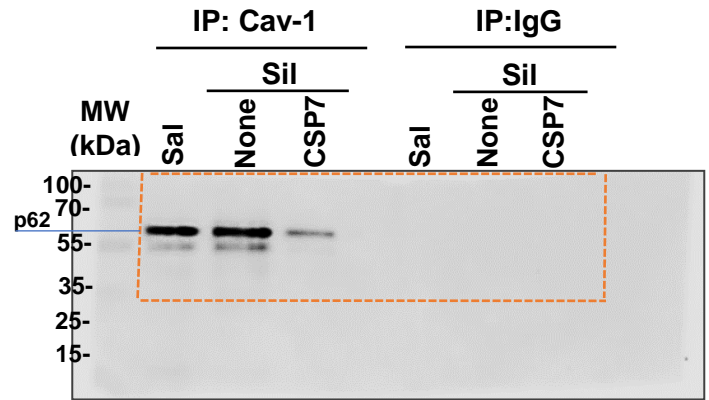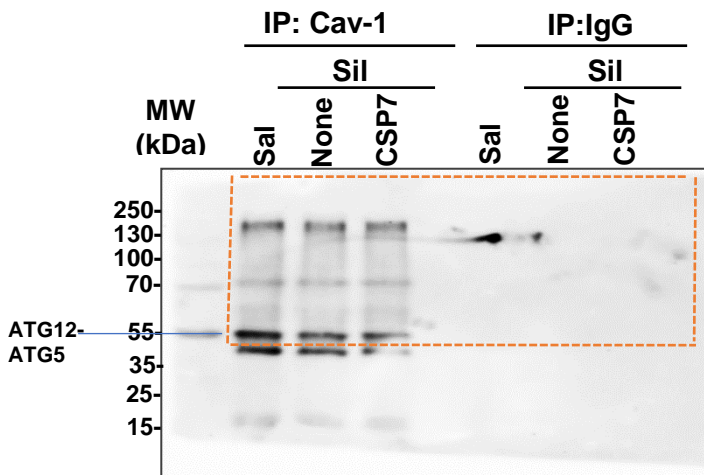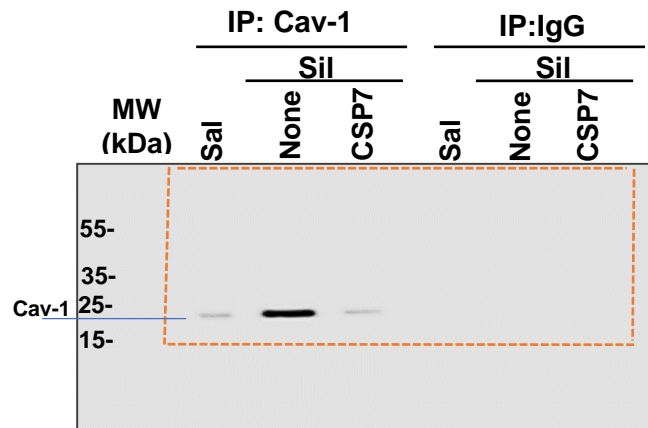

Fig 5G

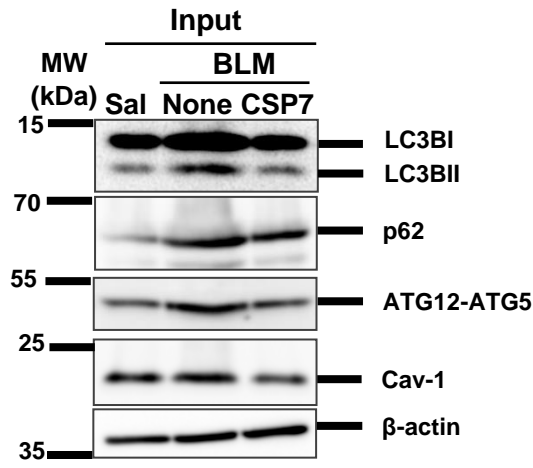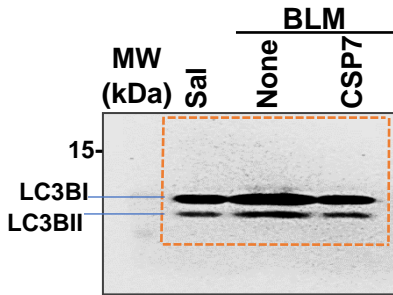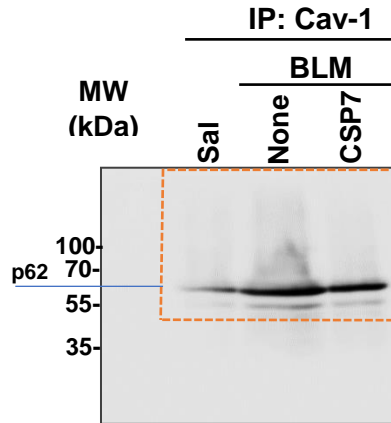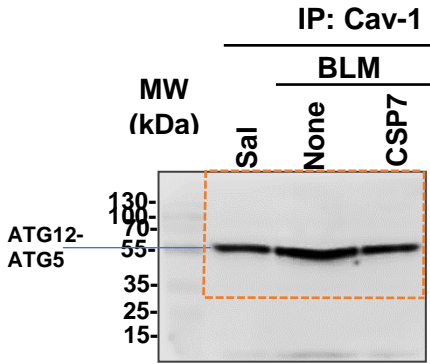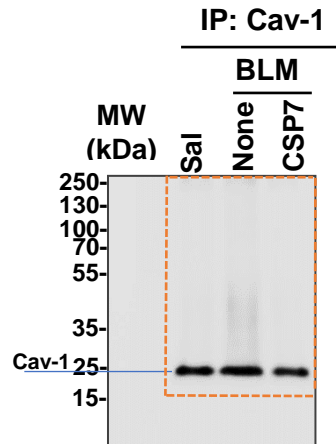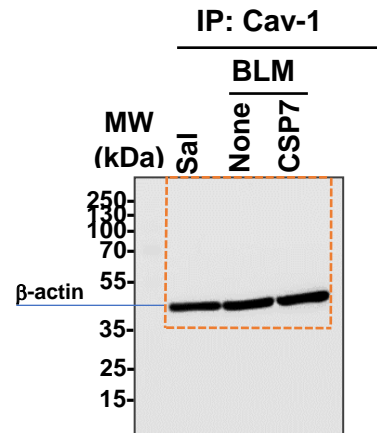



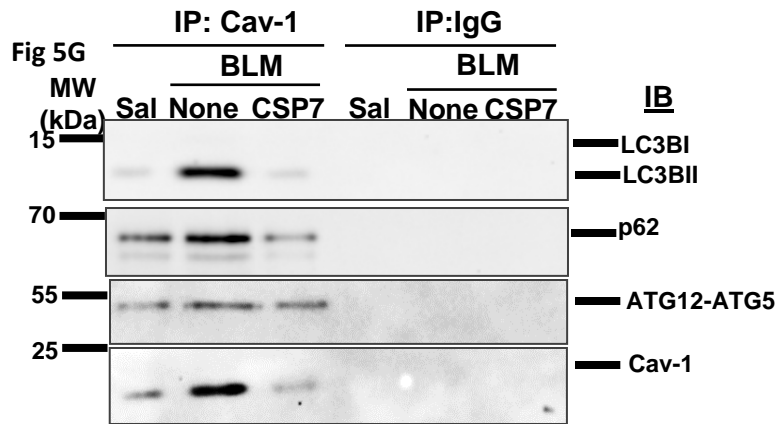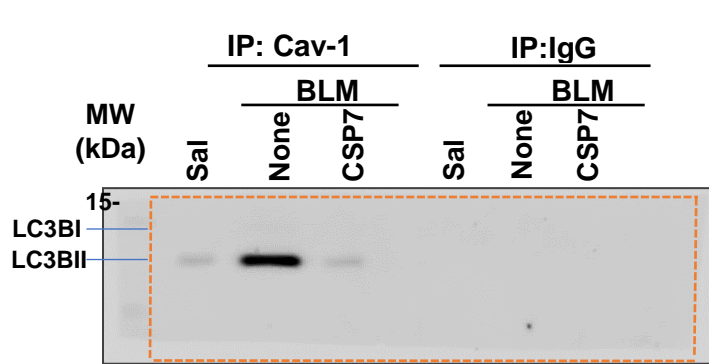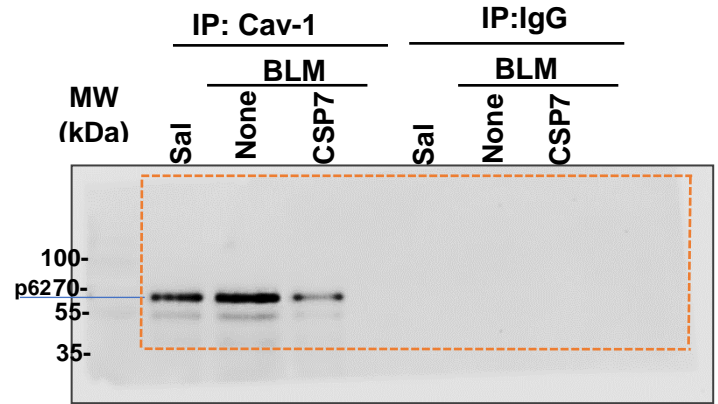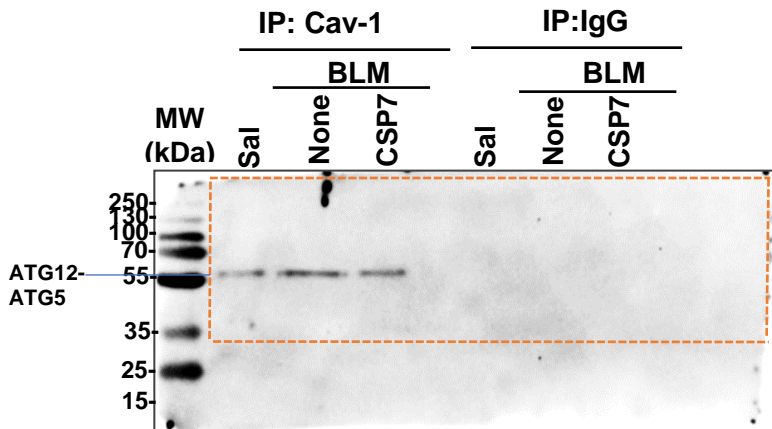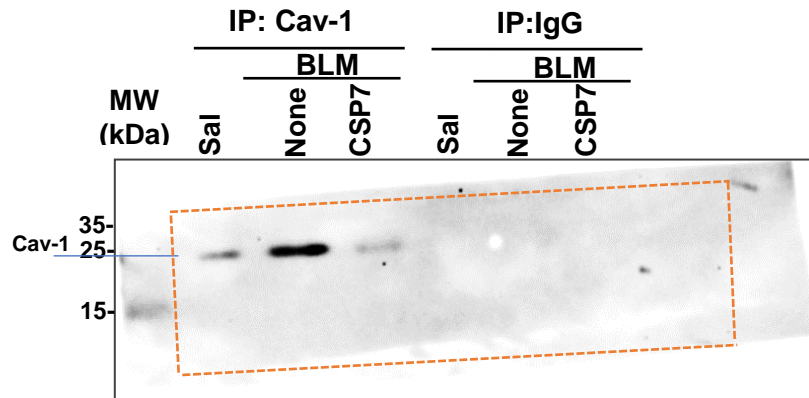

Fig 6A

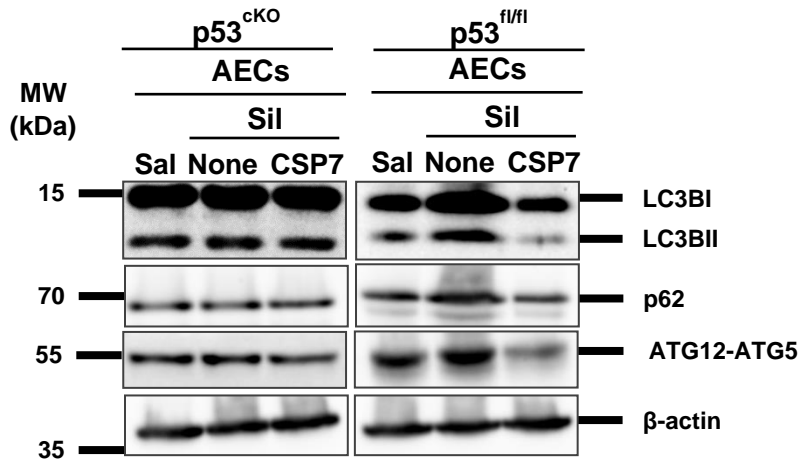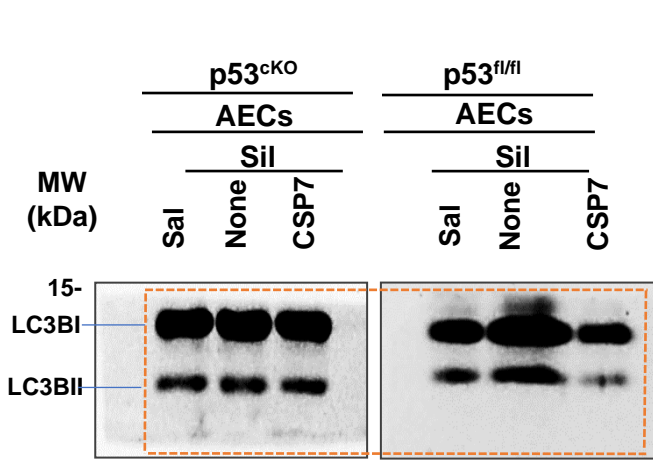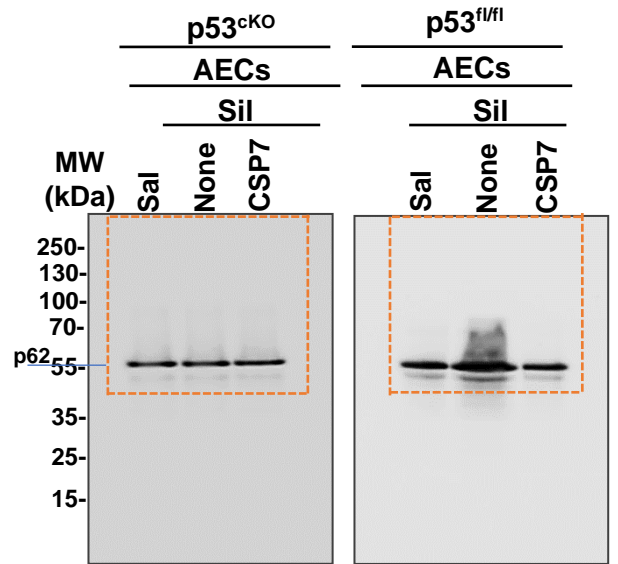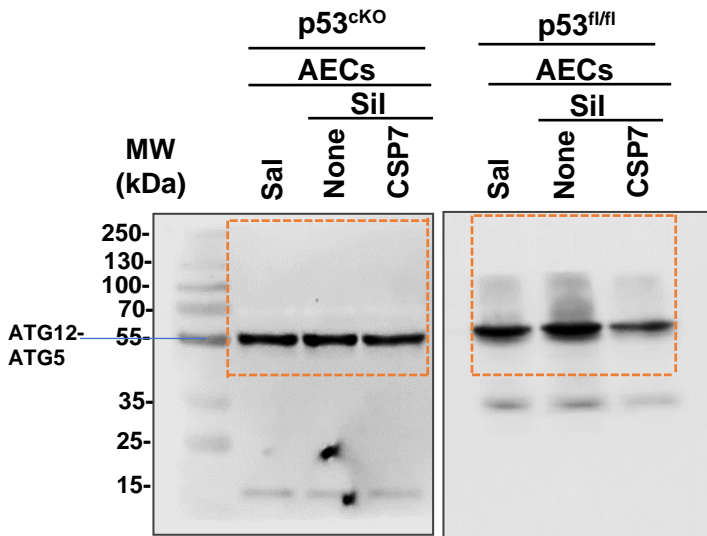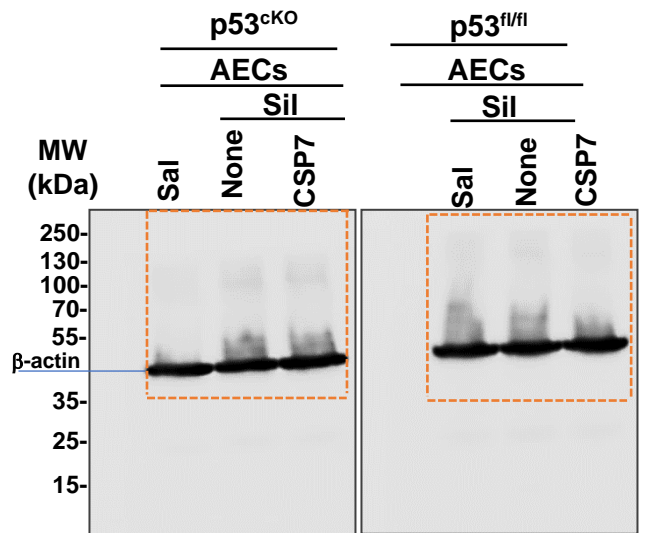

Fig 6B

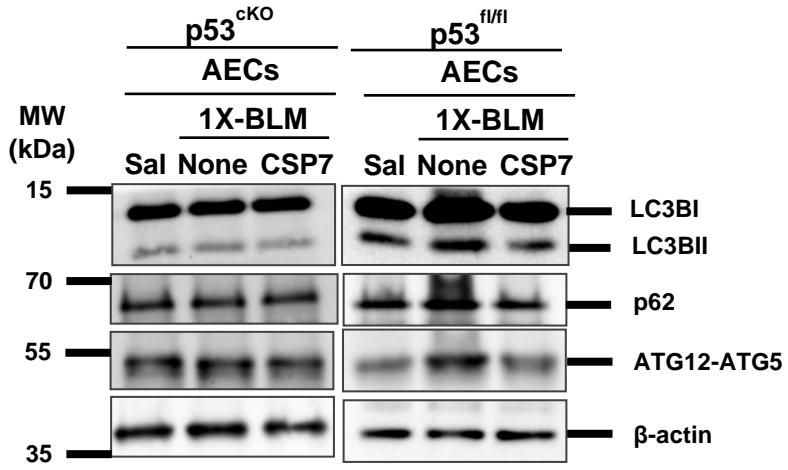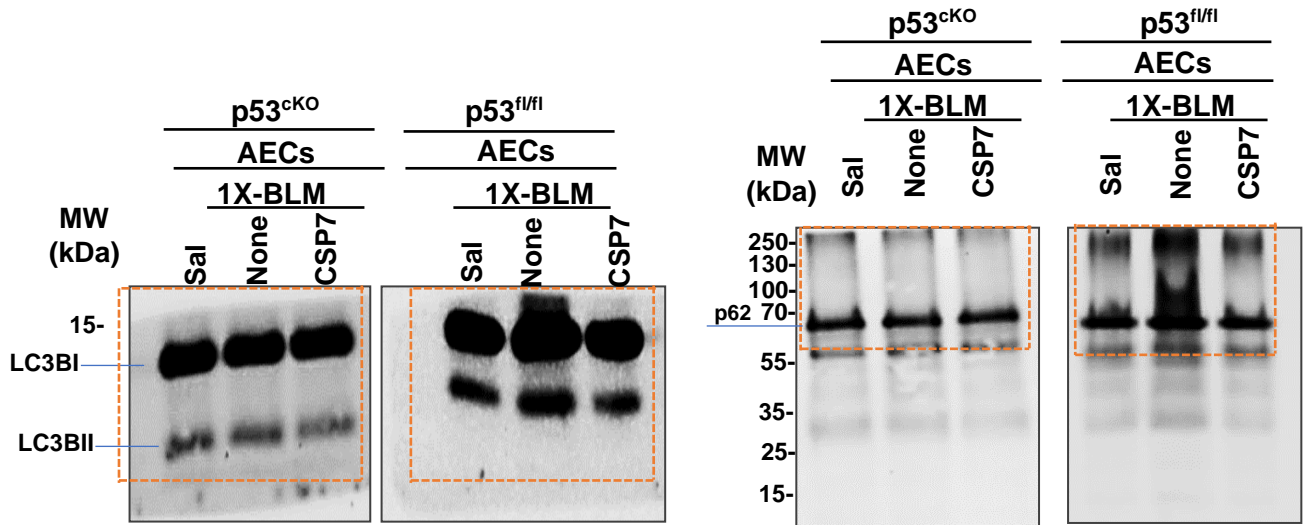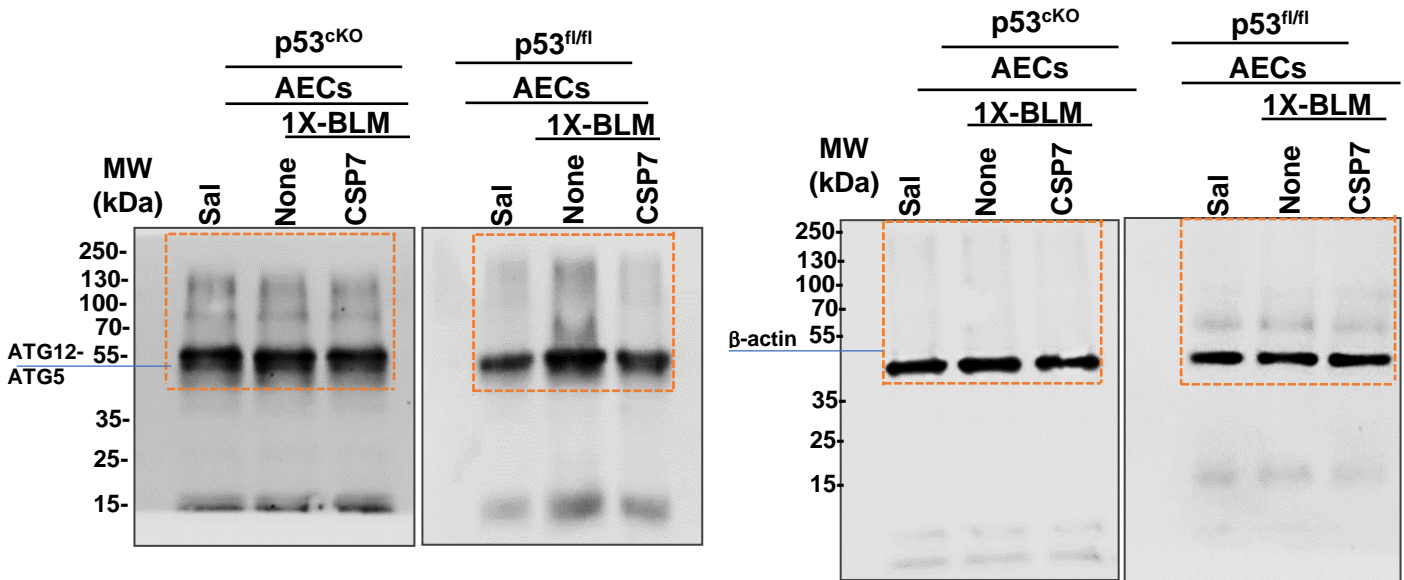

Fig S2

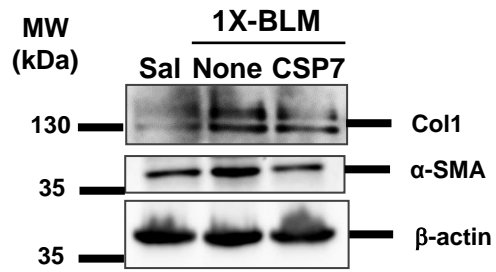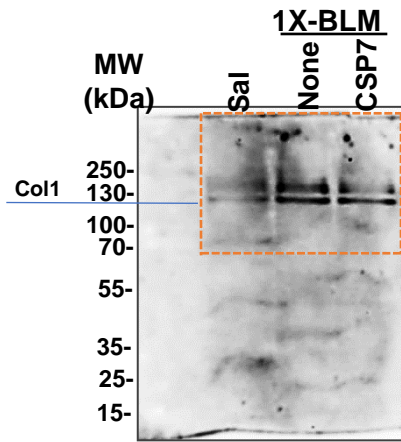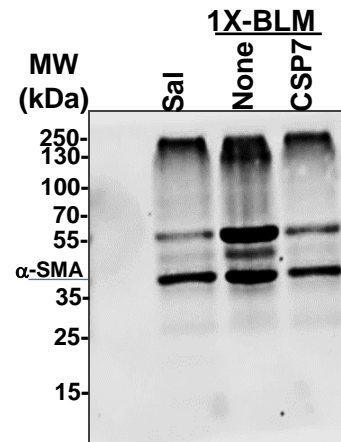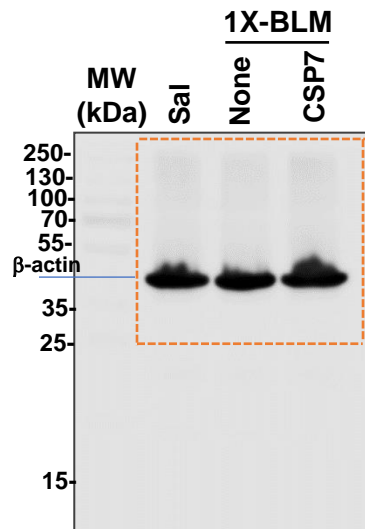

Fig S3

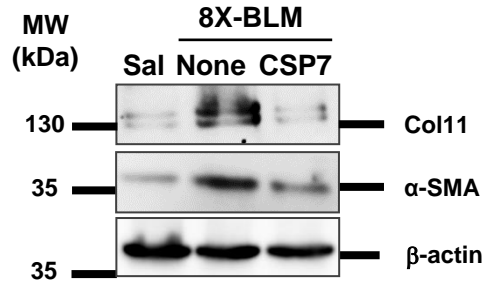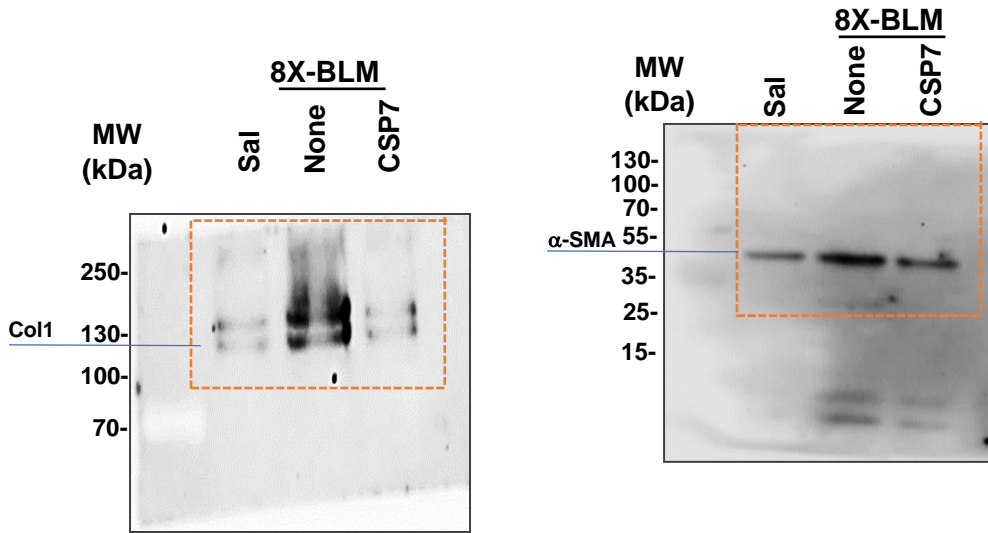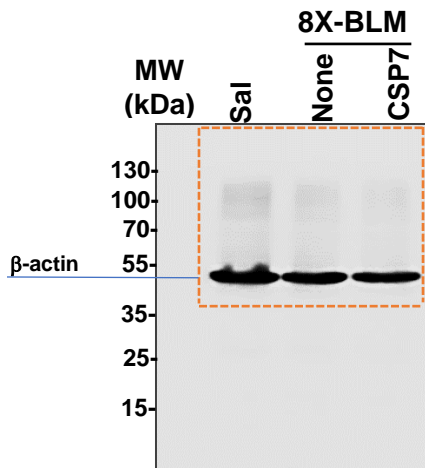

Supplement: 41598_2022_14832_MOESM1_ESM.pdf [file 41598_2022_14832_MOESM1_ESM.pdf]
